# Supplementary material for: Screening for electrically conductive defects in thin functional films using electrochemiluminescence
Source: Royal Society of Chemistry journal article supplement (doi:10.1039/d3ay00687e), 2023-01-01
Supplement: d3ay00687e1.pdf [file d3ay00687e1.pdf]

Supporting Information

for

**Screening for electrically conductive defects in thin functional films using  
electrochemiluminescence**

Harley Quinn,<sup>a</sup> Wenlu Wang,<sup>a</sup> Jörg G. Werner,<sup>ab</sup> and Keith A. Brown<sup>\*abc</sup>

<sup>a</sup>Division of Materials Science & Engineering, Boston University, Boston, MA, 02215, USA.

<sup>b</sup>Department of Mechanical Engineering, Boston University, Boston, MA, 02215, USA

<sup>c</sup>Department of Physics, Boston University, Boston, MA, 02215, USA

\*E-mail: brownka@bu.edu

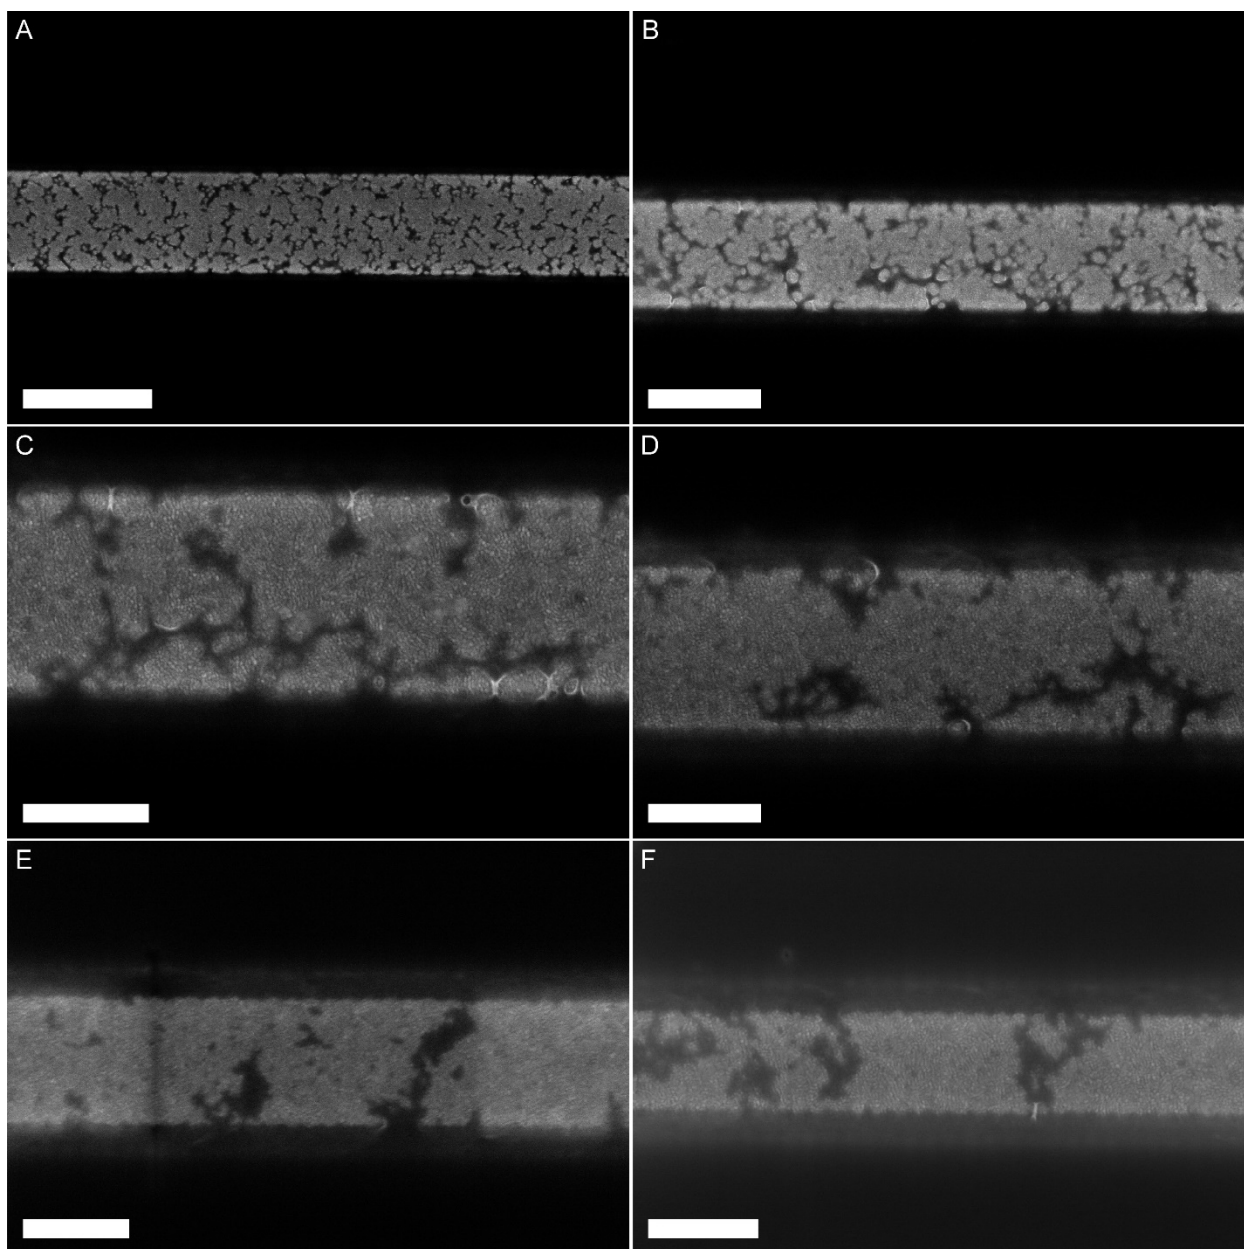

**Figure S1: Scanning electron microscopy (SEM) images of lines of exposed indium tin oxide (ITO) with measured widths of (A) 1.46  $\mu\text{m}$  (B) 0.93  $\mu\text{m}$  (C) 0.77  $\mu\text{m}$  (D) 0.72  $\mu\text{m}$  (E) 0.60  $\mu\text{m}$  (F) 0.44  $\mu\text{m}$ . The background region is covered by a polymethylmethacrylate film. Scale bar for (A) is 2  $\mu\text{m}$ . Scale bar for (B) is 1  $\mu\text{m}$ . Scale bars for (C), (D), (E), and (F) are 500 nm.**

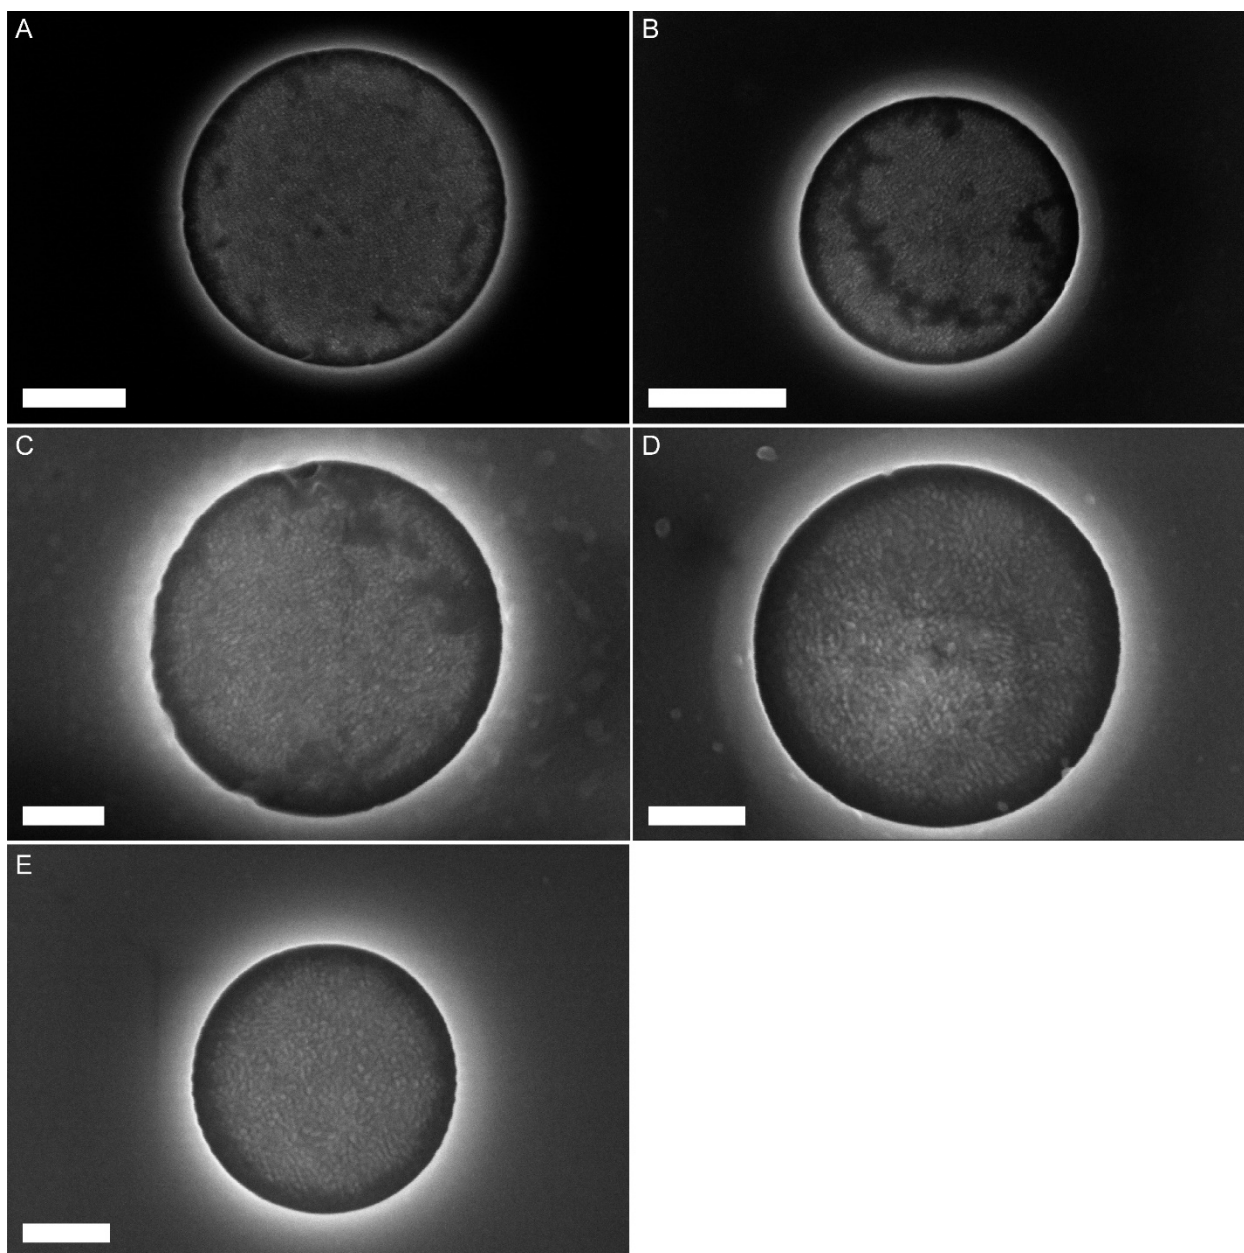

**Figure S2: SEM images of circles of exposed ITO with measured diameters of (A) 1.63  $\mu\text{m}$  (B) 1.03  $\mu\text{m}$  (C) 0.90  $\mu\text{m}$  (D) 0.78  $\mu\text{m}$  (E) 0.62  $\mu\text{m}$ . The background region is covered by a polymethylmethacrylate film. Scale bars for (A) and (B) are 500 nm. Scale bars for (C), (D), and (E) are 200 nm.**
